# Supplementary material
Source: Springer Nature journal article supplement (https://www.springermedizin.de/resource/supplementary/12865_2009_301_MOESM8_ESM.pdf/9427706)

**A**

Head kidney STAT1

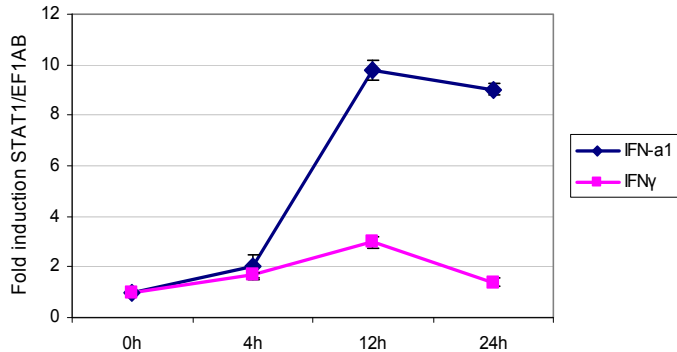**B**

Head kidney Mx

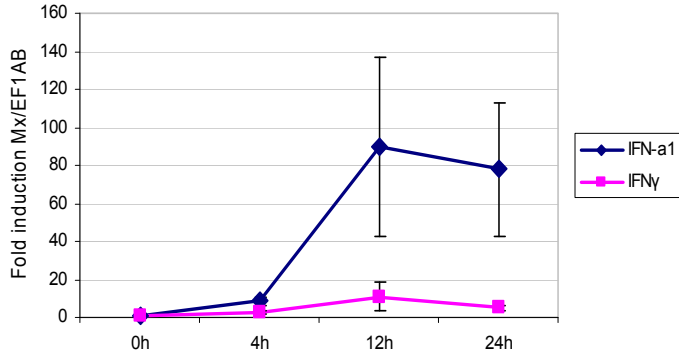

Supplement: MOESM8 [file 9427706]
